# Supplementary material
Source: publisher site journal article supplement (https://www.dovepress.com/article/313857)

**Supplemental Appendix**

This appendix has been provided by the authors to give readers additional information about this work.

Supplement to: Dingwei D, Alvarez PJ, Woods SD. A predictive model for progression of chronic kidney disease to kidney failure using a large administrative claims database.

**Table of Contents**

**Supplemental Table 1** Variables with significant univariate association to first identification of kidney failure in the prediction year **2**

**Supplemental Figure 1** Comparison of logistic regression and other machine learning algorithms to predict progression of CKD stage 3 or 4 to kidney failure **3**

**Supplemental Table 1.** Variables with significant univariate association to first identification of kidney failure in the prediction year

| Age | Dementia | Liver disease |
| --- | --- | --- |
| Allergy | Depression | Malignant neoplasms |
| Anxiety | Diabetes mellitus | Metabolic syndrome |
| ARB | ERG | Migraine |
| Asthma | Gender | MRA use |
| Atrial fibrillation | Hepatitis | Obesity |
| Beta-blocker use | Human immunodeficiency virus disease | Osteoarthritis |
| Business line (commercial vs Medicare Advantage) | Hyperkalemia | Osteoporosis |
| Calcineurin inhibitor use | Hyperlipidemia | Proportion of days covered ≥80% |
| Cerebrovascular disease | Hypertension | Peripheral artery disease |
| Congestive heart failure | Inflammatory bowel disease | Prospective ERG risk scores |
| CKD stage | Iron deficiency anemia | RAASi at optimal dose |
| Chronic thyroid disorders | Ischemic heart disease | Geographic region |
| Congenital heart disease | Kidney stone history | Rheumatoid arthritis |
| Chronic obstructive pulmonary disease | CKD stage switch | Urban vs rural residence |

ARB, angiotensin II receptor blocker; CKD, chronic kidney disease; ERG, episode risk group; HK, hyperkalemia; MRA, mineralocorticoid receptor antagonist; RAASi, renin-angiotensin-aldosterone system inhibitor

**Supplemental Figure 1**: Comparison of logistic regression and other machine learning algorithms to predict progression of CKD stage 3 or 4 to kidney failure. The predictive performance of logistic regression, gradient boosting, neural network, and support vector machine are similar, ROC index all = 0.85; random forest works well, ROC index = 0.83; decision tree is the worst, ROC index = 0.73.


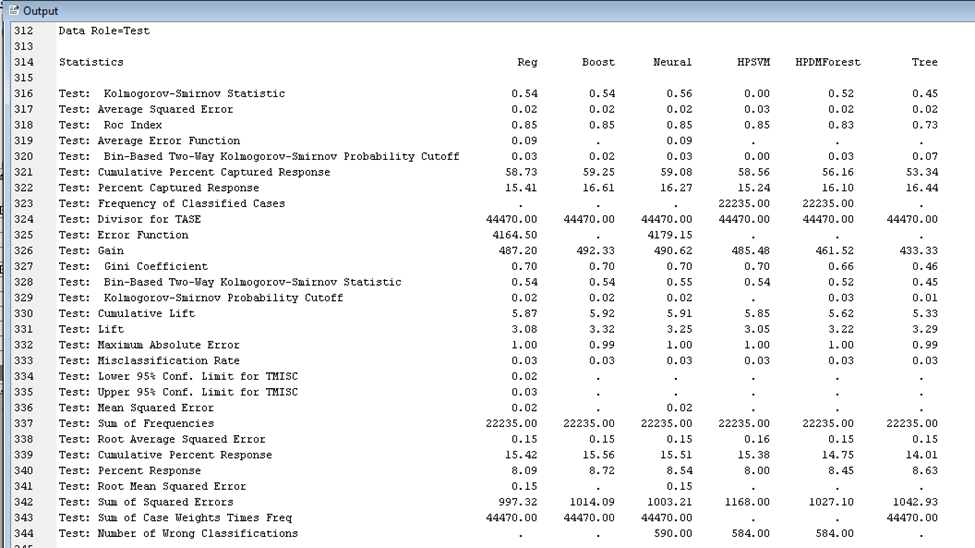

Supplement: Supplementary file 1 [file get_supplementary_file.php]
